# Supplementary material
Source: publisher figshare collection journal article supplement (https://karger.figshare.com/ndownloader/files/28324146)
Supplement: Supplementary file 1 [file 28324146]

Supplementary Table 1. Summary of laboratory parameters at baseline and at Week 6 (safety analysis set)

| **Parameter** | **Time of evaluation** | **Placebo** | **Tenapanor** |
| --- | --- | --- | --- |
| **Sodium (mEq/L)** | | | |
|  | Baseline (Week 1) | 138.6 (2.7) | 139.8 (2.5) |
|  | Week 6 | 139.4 (2.3) | 138.5 (3.3) |
| **Potassium (mEq/L)** | | | |
|  | Baseline (Week 1) | 5.18 (0.66) | 5.13 (0.74) |
|  | Week 6 | 5.23 (0.50) | 5.21 (0.95) |
| **Chloride (mEq/L)** | | | |
|  | Baseline (Week 1) | 101.7 (3.1) | 103.1 (2.4) |
|  | Week 6 | 102.6 (3.2) | 103.9 (3.7) |
| **Magnesium (mg/dL)** | | | |
|  | Baseline (Week 1) | 2.68 (0.31) | 2.60 (0.40) |
|  | Week 6 | 2.65 (0.25) | 2.63 (0.49) |
| **Bicarbonate (mmol/L)** | | | |
|  | Baseline (Week 1) | 16.46 (1.87) | 17.20 (2.00) |
|  | Week 6 | 17.24 (2.04) | 17.13 (2.18) |
| **Intact parathyroid hormone (pg/mL)** | | | |
|  | Baseline (Week 1) | 174.7 (130.4) | 168.0 (129.9) |
|  | Week 6 (LOCF) | 162.4 (118.6) | 166.8 (122.8) |
| **Intact fibroblast growth factor 23 (pg/mL)** | | | |
|  | Baseline (Week 1) | 15201.79 (17761.30) | 14427.83 (9876.87) |
|  | Week 6 (LOCF) | 17900.32 (18412.18) | 5773.13 (4570.75) |

Data in the table are shown as mean (standard deviation).

LOCF, last observation carried forward
